# Supplementary material for: Diversity and activity of sugar transporters in nematode-induced root syncytia
Source: PubMed Central journal article supplement — J Exp Bot. 2009 Jun 1;60(11):3085–95. doi: 10.1093/jxb/erp138 (PMC2718214; doi:10.1093/jxb/erp138), 2009-06-01
Supplement: erp138_1.pdf [file erp138_1.pdf]

**Supplements: Diversity and activity of sugar transporters in nematode-induced root syncytia**

Hofmann Julia, Hess Paul H., Szakasits Dagmar, Blöchl Andreas, Wieczorek Krzysztof, Daxböck-Horvath Sabine, Bohlmann Holger, van Bel Aart J.E., Grundler Florian M.W.

**Table S1.** Gene chip analysis of 5 and 15 day old syncytia in comparison with non-infected root pieces. The normalised-values show the transcript levels of the single genes in the specific tissues. Further, fold change ( $\log_2$ ) of syncytia (syn) versus controls (con) and the two syncytia time points compared to each other are given. Asterisks indicate significances determined by a Benjamini-Hochberg multiple correction test (\* =  $q < 10\%$ ; \*\* =  $q < 5\%$ ; \*\*\* =  $q < 1\%$  see Methods section for details)

| Locus     | Raw values ( $\log_2$ ) |      |       | Fold change ( $\log_2$ ) |     |       |     | 5 vs. 15dai ( $\log_2$ ) |   | Family | TAIR Description |                                                 |
|-----------|-------------------------|------|-------|--------------------------|-----|-------|-----|--------------------------|---|--------|------------------|-------------------------------------------------|
|           | con                     | 5dai | 15dai | 5dai                     | q   | 15dai | q   | 15dai                    | q |        |                  |                                                 |
| At4g21480 | 6,72                    | 8,71 | 8,99  | 2,22                     | **  | 2,51  | **  | 0,29                     |   | STP12  | ht               | hexose transporter                              |
| At5g17520 | 7,13                    | 8,81 | 8,84  | 1,68                     | *** | 1,71  | *** | 0,03                     |   | MEX1   | st               | maltose transporter                             |
| At5g46110 | 6,88                    | 8,04 | 8,47  | 1,14                     | **  | 1,57  | **  | 0,43                     |   | APE2   | vst              | chloroplast Triose Phosphate Translocator       |
| At2g48020 | 8,52                    | 9,53 | 10,1  | 1,02                     | *** | 1,55  | **  | 0,54                     |   | ERD5   | erd              | early-responsive to dehydration stress protein  |
| At1g61800 | 4,79                    | 4,98 | 6,35  | 0,19                     |     | 1,54  | **  | 1,34                     | * | GPT2   | g6p              | glucose-6-phosphate/phosphate translocator      |
| At5g59740 | 7,23                    | 8,6  | 8,65  | 1,38                     | *** | 1,40  | **  | 0,02                     |   | ATUTR5 | nst              | UDP-galactose/UDP-glucose transporter-related   |
| At5g41760 | 7,28                    | 8,22 | 8,29  | 0,95                     | **  | 1,03  | **  | 0,07                     |   |        | nst              | nucleotide-sugar transporter                    |
| At4g19120 | 9,63                    | 11,3 | 10,6  | 1,66                     | *** | 1,01  | **  | -0,65                    | * | ERD3   | erd              | early-responsive to dehydration stress protein  |
| At1g43310 | 7,85                    | 9,57 | 8,84  | 1,66                     | **  | 0,96  |     | -0,70                    |   |        | vst              | triose phosphate/phosphate translocator-related |
| At5g16150 | 9,78                    | 10,3 | 10,6  | 0,57                     |     | 0,80  | **  | 0,24                     |   | pGlcT  | pgt              | putative plastidal Glc-transporter              |
| At5g17630 | 7,24                    | 8,34 | 7,99  | 1,05                     | **  | 0,69  |     | -0,35                    |   |        | nst              | glucose transporter                             |
| At5g54800 | 8,75                    | 8,89 | 9,5   | -0,04                    |     | 0,66  |     | 0,70                     |   | GPT1   | g6p              | glucose6-Phosphate/phosphate transporter        |
| At1g71880 | 7,46                    | 7,27 | 8,09  | -0,19                    |     | 0,62  | *   | 0,80                     | * | SUC1   | suc              | sucrose transporter                             |
| At1g09960 | 6,55                    | 6,84 | 7,13  | 0,28                     |     | 0,57  |     | 0,29                     |   | SUC4   | suc              | sucrose transporter                             |
| At3g03090 | 5,55                    | 5,86 | 6,04  | 0,32                     |     | 0,48  |     | 0,16                     |   | VGT1   | vst              | vacuolar glucose transporter                    |
| At2g02810 | 6,13                    | 6,55 | 6,57  | 0,41                     |     | 0,38  |     | -0,02                    |   | UTR1   | nst              | UDP-galactose/UDP-glucose transporter,          |
| At3g05400 | 6,95                    | 7,74 | 7,35  | 0,80                     | **  | 0,38  |     | -0,43                    |   | ERD12  | erd              | early-responsive to dehydration stress protein  |

|           |      |      |      |         |       |         |        |     |                                                                    |
|-----------|------|------|------|---------|-------|---------|--------|-----|--------------------------------------------------------------------|
| At3g59360 | 6,57 | 6,53 | 6,95 | -0,06   | 0,35  | 0,41    | UTR6   | nst | UDP-Galactose transporter                                          |
| At4g32270 | 6,68 | 6,72 | 6,99 | 0,06    | 0,33  | 0,28    |        | st  | UDP-sugar transporter-related                                      |
| At1g11260 | 9,17 | 8,08 | 9,32 | -0,96 * | 0,30  | 1,26 ** | STP1   | ht  | hexose transporter                                                 |
| At1g79820 | 8,84 | 9,08 | 9,1  | 0,27    | 0,29  | 0,02    | SGB1   | pgt | putative plastidal Glc-transporter                                 |
| At4g16480 | 7,9  | 8,24 | 8,04 | 0,44    | 0,25  | -0,19   | INT4   | int | inositol transporter                                               |
| At2g18480 | 5,31 | 5,3  | 5,55 | -0,02   | 0,24  | 0,26    |        | man | mannitol transporter, putative                                     |
| At5g59250 | 8,63 | 8,64 | 8,86 | 0,04    | 0,24  | 0,20    |        | st  | sugar transporter family protein                                   |
| At5g65000 | 9,33 | 9,34 | 9,57 | 0,06    | 0,24  | 0,19    |        | nst | nucleotide-sugar transporter family protein                        |
| At1g08900 | 6,74 | 6,87 | 6,97 | 0,13    | 0,23  | 0,10    | ERD2   | erd | early-responsive to dehydration stress protein                     |
| At3g46180 | 5,76 | 6,17 | 5,99 | 0,38    | 0,22  | -0,16   | UTR5   | nst | UDP-galactose/UDP-glucose transporter-related                      |
| At1g08920 | 8,44 | 8,27 | 8,58 | -0,19   | 0,20  | 0,38    | ERD    | erd | early-responsive to dehydration stress protein                     |
| At5g61520 | 7,05 | 7,33 | 7,22 | 0,26    | 0,19  | -0,07   | STP3   | ht  | hexose transporter                                                 |
| At1g07290 | 6,01 | 5,95 | 6,17 | -0,03   | 0,18  | 0,20    |        | nst | nucleotide-sugar transporter                                       |
| At1g71890 | 5,37 | 5,85 | 5,55 | 0,48    | 0,17  | -0,30   | SUC5   | suc | sucrose transporter                                                |
| At2g43240 | 5,47 | 5,57 | 5,63 | 0,11    | 0,16  | 0,05    |        | nst | nucleotide-sugar transporter/ sugar porter                         |
| At5g17010 | 8,63 | 8,58 | 8,7  | 0,00    | 0,08  | 0,08    | VGT2   | vst | vacuolar glucose transporter                                       |
| At1g21870 | 5,77 | 5,62 | 5,85 | -0,13   | 0,08  | 0,21    |        | g6p | glucose-6-phosphate/phosphate translocator-related                 |
| At1g50310 | 5,46 | 5,44 | 5,48 | 0,02    | 0,06  | 0,04    | STP8   | ht  | monosaccharide transporter                                         |
| At5g26250 | 5,81 | 5,67 | 5,87 | -0,14   | 0,05  | 0,19    | STP9   | ht  | sugar transporter, putative                                        |
| At4g35300 | 8,03 | 7,8  | 7,99 | -0,28   | -0,02 | 0,26    | AtTMT2 | vst | tonoplast monosaccharide transporter                               |
| At5g06170 | 6,82 | 6,66 | 6,79 | -0,17   | -0,03 | 0,13    | SUC9   | suc | sucrose transporter                                                |
| At5g43610 | 4,99 | 4,99 | 4,94 | 0,00    | -0,03 | -0,04   | SUC6   | suc | sucrose transporter                                                |
| At2g16120 | 5,53 | 5,49 | 5,48 | -0,04   | -0,06 | -0,02   |        | man | mannitol transporter,                                              |
| At2g35740 | 4,84 | 4,83 | 4,74 | -0,02   | -0,10 | -0,07   | INT3   | int | inositol transporter                                               |
| At4g03950 | 5,16 | 5,17 | 5,06 | 0,01    | -0,10 | -0,10   |        | g6p | glucose-6-phosphate/phosphate translocator, putative               |
| At1g22710 | 7,06 | 6,48 | 6,78 | -0,40   | -0,10 | 0,30    | SUC2   | suc | sucrose transporter                                                |
| At1g66570 | 4,31 | 4,23 | 4,18 | -0,07   | -0,13 | -0,06   | SUC7   | suc | sucrose transporter, putative / sucrose-proton symporter, putative |
| At1g14360 | 7,81 | 7,96 | 7,68 | 0,15    | -0,14 | -0,29   | UTR3   | nst | UDP-galactose/UDP-glucose transporter,                             |
| At1g34580 | 6,86 | 6,82 | 6,73 | -0,06   | -0,14 | -0,08   | STP5   | ht  | monosaccharide transporter, putative                               |
| At5g26340 | 4,77 | 4,69 | 4,63 | -0,08   | -0,14 | -0,06   | STP13  | ht  | hexose transporter, putative                                       |
| At3g51490 | 6,58 | 6,31 | 6,45 | -0,28   | -0,16 | 0,13    | AtTMT3 | vst | tonoplast monosaccharide transporter                               |
| At3g19940 | 6,02 | 5,97 | 5,85 | -0,06   | -0,17 | -0,11   | STP10  | ht  | sugar transporter, putative                                        |
| At2g14670 | 5,74 | 5,54 | 5,55 | -0,18   | -0,17 | 0,00    | SUC8   | suc | sucrose transporter                                                |
| At5g27360 | 5,9  | 5,57 | 5,71 | -0,34   | -0,18 | 0,15    | SFP2   | st  | sugar-porter family protein                                        |
| At4g04760 | 5,72 | 5,58 | 5,52 | -0,14   | -0,20 | -0,06   | ERD    | erd | early-responsive to dehydration stress protein                     |

|           |      |      |      |       |     |       |     |       |        |     |                                                |
|-----------|------|------|------|-------|-----|-------|-----|-------|--------|-----|------------------------------------------------|
| At1g07340 | 5,2  | 4,83 | 5    | -0,36 |     | -0,20 |     | 0,16  | STP2   | ht  | hexose transporter                             |
| At5g23270 | 4,59 | 4,49 | 4,38 | -0,11 |     | -0,21 |     | -0,10 | STP11  | ht  | sugar transporter, putative                    |
| At5g18840 | 5,57 | 5,24 | 5,34 | -0,32 |     | -0,23 |     | 0,09  | ERD16  | erd | early-responsive to dehydration stress protein |
| At1g30220 | 7,76 | 7,26 | 7,55 | -0,52 |     | -0,23 |     | 0,29  | AtINT2 | int | inositol transporter                           |
| At3g05960 | 5,5  | 5,19 | 5,2  | -0,30 |     | -0,28 |     | 0,03  | STP6   | ht  | sugar transporter, putative                    |
| At1g77210 | 7,05 | 6,65 | 6,67 | -0,40 |     | -0,35 |     | 0,05  | STP14  | ht  | hexose transporter                             |
| At3g01550 | 5,36 | 5,16 | 4,99 | -0,22 |     | -0,37 |     | -0,15 |        | st  | sugar transporter family protein               |
| At3g05150 | 5,29 | 4,86 | 4,88 | -0,42 |     | -0,40 |     | 0,02  | ERD8   | erd | early-responsive to dehydration stress protein |
| At2g20780 | 8,73 | 8,06 | 8,29 | -0,66 | **  | -0,42 |     | 0,24  |        | man | mannitol transporter, putative                 |
| At1g05030 | 8,9  | 8,29 | 8,38 | -0,55 |     | -0,47 |     | 0,09  |        | pgt | putative plastidal Glc-transporter             |
| At2g43330 | 7,51 | 6,96 | 6,96 | -0,47 |     | -0,47 |     | 0,00  | AtINT1 | int | inositol transporter                           |
| At2g41490 | 8,31 | 7,84 | 7,83 | -0,46 |     | -0,48 |     | -0,01 |        | st  | UDP-GlcNAc                                     |
| At4g04750 | 6,08 | 5,41 | 5,42 | -0,64 | **  | -0,63 | **  | 0,01  | ERD    | erd | early-responsive to dehydration stress protein |
| At1g67300 | 10,1 | 9,12 | 9,47 | -0,98 | *** | -0,67 |     | 0,31  |        | pgt | putative plastidal Glc-transporter             |
| At2g02860 | 8,79 | 8,11 | 8,09 | -0,66 | **  | -0,68 | **  | -0,02 | SUC3   | suc | sucrose transporter                            |
| At2g17840 | 10,6 | 8,91 | 9,81 | -1,56 | **  | -0,71 |     | 0,85  | ERD7   | erd | early-responsive to dehydration stress protein |
| At1g20840 | 6,94 | 5,78 | 5,82 | -1,07 | **  | -1,04 | **  | 0,04  | TMT1   | vst | tonoplast monosaccharide transporter           |
| At1g75220 | 9,13 | 7,53 | 7,82 | -1,50 | **  | -1,19 | *   | 0,31  | ERD    | erd | early-responsive to dehydration stress protein |
| At2g13650 | 9,09 | 7,64 | 7,85 | -1,43 | *** | -1,20 | **  | 0,23  | GONST1 | nst | GDP-mannose transporter                        |
| At1g30360 | 9,97 | 9,04 | 8,68 | -1,01 | **  | -1,30 | **  | -0,29 | ERD4   | erd | early-responsive to dehydration stress protein |
| At1g76180 | 12,5 | 11,2 | 10,9 | -0,79 |     | -1,41 |     | -0,61 | ERD14  | erd | early-responsive to dehydration stress protein |
| At4g23010 | 9,16 | 7,64 | 7,76 | -1,54 | *** | -1,41 | **  | 0,13  | UTR2   | nst | UDP-galactose transporter-related              |
| At3g05165 | 8,76 | 7,14 | 7,32 | -1,60 | *** | -1,43 | *** | 0,17  | ERD11  | erd | early-responsive to dehydration stress protein |
| At3g18830 | 10,1 | 8,27 | 8,62 | -1,83 | *** | -1,48 | *** | 0,35  | PLT5   | st  | polyol transporter                             |
| At3g19930 | 9,88 | 8,35 | 8,01 | -1,23 |     | -1,58 | *   | -0,34 | STP4   | ht  | hexose transporter                             |
| At1g19450 | 10,5 | 8,61 | 8,63 | -1,88 | *** | -1,82 | *** | 0,06  | ERD    | erd | early-responsive to dehydration stress protein |
| At1g54730 | 7,66 | 5,78 | 5,72 | -1,82 | **  | -1,89 | *** | -0,07 | ERD    | erd | early-responsive to dehydration stress protein |
| At4g02050 | 9,94 | 7,98 | 7,81 | -1,84 | **  | -2,01 | **  | -0,17 | STP7   | ht  | hexose transporter                             |
| At3g20460 | 6,8  | 4,58 | 4,58 | -2,03 | **  | -2,04 | **  | -0,01 | ERD13  | erd | early-responsive to dehydration stress protein |
| At1g20450 | 13,5 | 11   | 11,2 | -2,49 | *** | -2,28 | *** | 0,21  | ERD10  | erd | early-responsive to dehydration stress protein |
| At4g36670 | 10,3 | 8    | 7,56 | -2,10 | **  | -2,53 | **  | -0,43 |        | man | mannitol transporter,                          |
| At5g27350 | 8,91 | 5,44 | 5,38 | -3,41 | *** | -3,49 | *** | -0,08 | SFP1   | st  | sugar-porter family protein                    |
| At1g08930 | 11,3 | 7,7  | 7,6  | -3,58 | *** | -3,67 | *** | -0,10 | ERD6   | erd | early-responsive to dehydration stress protein |

**Table S2.** Arabidopsis phloem-loading experiments with fluorescent labeled glucose. After eight hours the dye could be found in nematode-induced syncytia. Values are total number (of three replicated experiments) of dye-positive and –negative syncytia as well as the total number.

|          | 3dai | 5dai | 7dai | 9dai | 11dai |
|----------|------|------|------|------|-------|
| Positive | 38   | 41   | 73   | 81   | 86    |
| Negative | 0    | 6    | 1    | 0    | 1     |
| Total    | 38   | 47   | 74   | 81   | 87    |

**Table S3.** Nematode infection assay with *stp12* and wildtype Arabidopsis: raw data of plants, root length, and nematodes per Petri dish (Fig. 2E).

| <b>WT col</b> |                  |                  |             |      | <b><i>stp12</i></b> |                  |                  |             |      |
|---------------|------------------|------------------|-------------|------|---------------------|------------------|------------------|-------------|------|
| plants        | root length (cm) | inoculation (J2) | development |      | plants              | root length (cm) | inoculation (J2) | development |      |
|               |                  |                  | female      | male |                     |                  |                  | female      | male |
| 6             | 23               | 300              | 0           | 1    | 10                  | 39               | 500              | 3           | 11   |
| 4             | 18               | 200              | 0           | 4    | 11                  | 43               | 550              | 4           | 5    |
| 6             | 23               | 300              | 2           | 1    | 9                   | 35               | 450              | 2           | 6    |
| 10            | 33               | 500              | 2           | 12   | 10                  | 39               | 500              | 5           | 7    |
| 8             | 31               | 400              | 3           | 6    | 10                  | 39               | 500              | 4           | 5    |
| 6             | 23               | 360              | 5           | 8    | 8                   | 31               | 480              | 2           | 13   |
| 4             | 18               | 240              | 1           | 0    | 9                   | 35               | 540              | 3           | 11   |
| 6             | 23               | 360              | 1           | 11   | 7                   | 27               | 420              | 3           | 8    |
| 10            | 33               | 600              | 3           | 8    | 10                  | 39               | 600              | 4           | 14   |
| 8             | 31               | 480              | 3           | 5    | 8                   | 31               | 480              | 4           | 12   |
| 2             | 7                | 104              | 0           | 1    | 9                   | 35               | 468              | 2           | 13   |
| 9             | 35               | 468              | 3           | 10   | 10                  | 39               | 520              | 3           | 7    |
| 4             | 16               | 208              | 0           | 6    | 8                   | 31               | 416              | 4           | 15   |
| 5             | 20               | 260              | 0           | 11   | 11                  | 43               | 572              | 1           | 14   |
| 3             | 12               | 156              | 1           | 6    | 10                  | 39               | 520              | 0           | 10   |
